# Supplementary material for: Revolutionizing the probiotic functionality, biochemical activity, antibiotic resistance and specialty genes of Pediococcus acidilactici BCB1H via in-vitro and in-silico approaches
Source: publisher site journal article supplement (doi:10.1515/znc-2024-0074), 2024-07-19
Supplement: Supplementary file 1 [file j_znc-2024-0074_suppl_001.docx]

| Length: 1915620bp, Contigs: 4 | |
| --- | --- |
| General Info | |
| Genome ID | [1254.584](https://www.bv-brc.org/view/Genome/1254.584) |
| Genome Name | Pediococcus acidilactici BCB1H |
| Taxonomy Info | |
| Taxon ID | [1254](http://www.ncbi.nlm.nih.gov/Taxonomy/Browser/wwwtax.cgi?id=1254) |
| Superkingdom | Bacteria |
| Phylum | Bacillota |
| Class | Bacilli |
| Order | Lactobacillales |
| Family | Lactobacillaceae |
| Genus | Pediococcus |
| Species | Pediococcus acidilactici |
| Status | |
| Genome Status | WGS |
| Type Info | |
| Strain | BCB1H |
| Database Cross Reference | |
| Completion Date | 1/24/2022 |
| BioProject Accession | [PRJNA794945](http://www.ncbi.nlm.nih.gov/bioproject/?term=PRJNA794945) |
| BioSample Accession | [SAMN24664208](http://www.ncbi.nlm.nih.gov/biosample/SAMN24664208) |
| Assembly Accession | [GCA_021568595.1](http://www.ncbi.nlm.nih.gov/assembly/GCA_021568595.1) |
| Genbank Accessions | [JAKGSE000000000](http://www.ncbi.nlm.nih.gov/nuccore/JAKGSE000000000) |
| Sequence Info | |
| Sequencing Status | WGS |
| Sequencing Platform | Illumina HiSeq |
| Sequencing Depth | 12.0x |
| Assembly Method | ABySS v. MAY-2021 |
| Genome Statistics | |
| Contigs | [4](https://www.bv-brc.org/view/Genome/1254.584#view_tab=sequences) |
| Genome Length | 1915620 |
| GC Content | 42.37396 |
| Contig L50 | 1 |
| Contig N50 | 1820736 |
| Annotation Statistics | |
| tRNA | 56 |
| rRNA | 12 |
| CDS | 1905 |
| CDS Ratio | 0.9944561 |
| Hypothetical CDS | 379 |
| Hypothetical CDS Ratio | 0.2992126 |
| Partial CDS | 7 |
| Partial CDS Ratio | 0.0036745407 |
| PLFAM CDS | 1817 |
| PLFAM CDS Ratio | 0.95380574 |
| Genome Quality | |
| Coarse Consistency | 99.7 |
| Fine Consistency | 99.2 |
| Genome Quality | Good |

**Table S1: Genomic features and genome summary obtained by PATRIC**


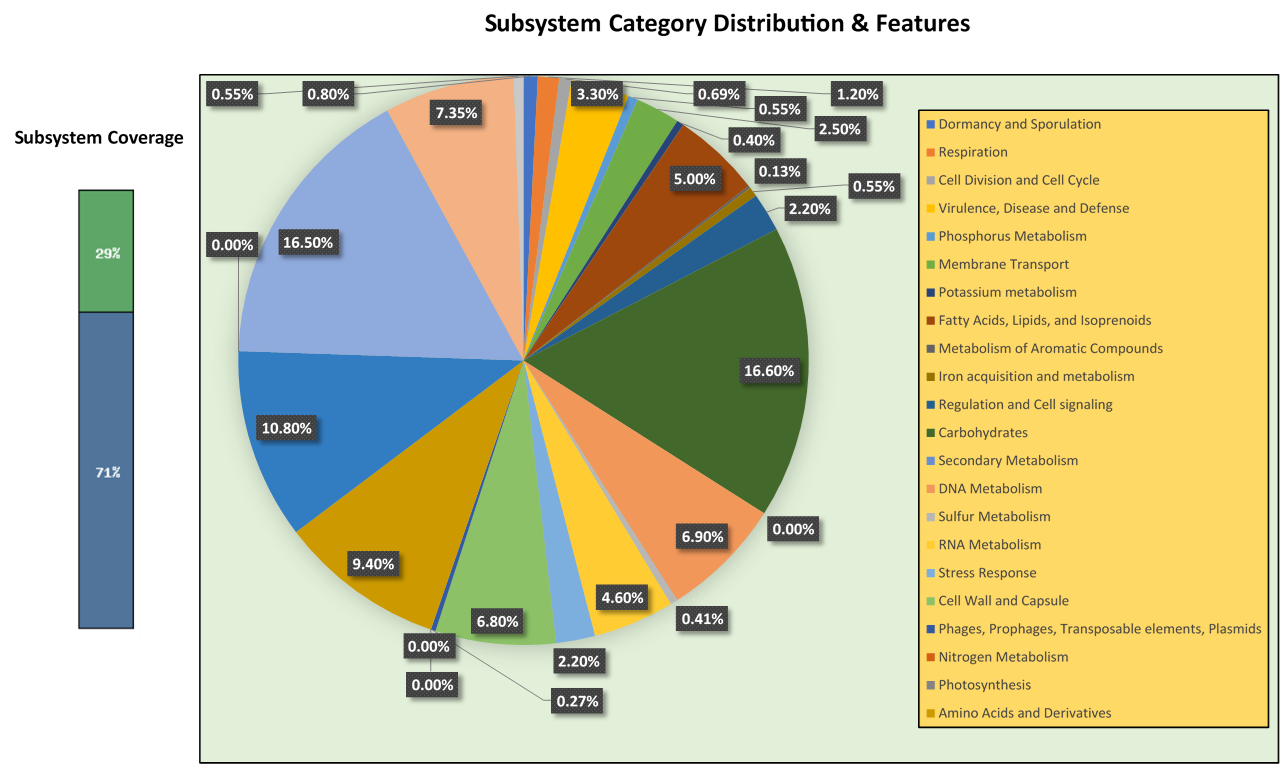


**Figure S1: Subsystem Distribution & Subsystem Coverage of Pediococcus acidilactici BCB1H genome obtained from RAST**
